# Supplementary material for: High Burden of Unrecognized Atrial Fibrillation in Rural India: An Innovative Community-Based Cross-Sectional Screening Program
Source: PubMed Central journal article supplement (PMC5083844; doi:10.2196/publichealth.6517), 2016-10-13
Supplement: publichealth_v2i2e159_app1.pdf [file publichealth_v2i2e159_app1.pdf]

| <b>Supplemental Table 1: Comparison of sociodemographic, lifestyle, and health characteristics of participants that were excluded vs. included in the study</b>                                                                                 |                  |                  |      |
|-------------------------------------------------------------------------------------------------------------------------------------------------------------------------------------------------------------------------------------------------|------------------|------------------|------|
|                                                                                                                                                                                                                                                 | Excluded         | Included         | p    |
| <b>Number</b>                                                                                                                                                                                                                                   | 119 <sup>a</sup> | 234 <sup>b</sup> |      |
| <b>Age</b>                                                                                                                                                                                                                                      |                  |                  |      |
| 50-55                                                                                                                                                                                                                                           | 27.7             | 26.9             |      |
| 55-65                                                                                                                                                                                                                                           | 43.7             | 38.9             | 0.54 |
| 65+                                                                                                                                                                                                                                             | 28.6             | 34.2             |      |
| <b>Female</b>                                                                                                                                                                                                                                   | 69.7             | 60.0             | 0.09 |
| <b>Education</b>                                                                                                                                                                                                                                |                  |                  |      |
| None                                                                                                                                                                                                                                            | 43.9             | 31.0             |      |
| 10th Grade or less                                                                                                                                                                                                                              | 49.1             | 56.3             | 0.04 |
| More than 10th Grade                                                                                                                                                                                                                            | 7.0              | 12.7             |      |
| <b>Works for pay</b>                                                                                                                                                                                                                            | 23.2             | 26.8             | 0.50 |
| <b>Daily household income<sup>b</sup></b>                                                                                                                                                                                                       |                  |                  |      |
| Less than \$1                                                                                                                                                                                                                                   | 37.3             | 30.7             |      |
| \$1-2                                                                                                                                                                                                                                           | 19.5             | 27.3             | 0.32 |
| \$2-4                                                                                                                                                                                                                                           | 26.3             | 22.9             |      |
| >\$4                                                                                                                                                                                                                                            | 16.9             | 19.1             |      |
| <b>Smoking history</b>                                                                                                                                                                                                                          | 7.6              | 11.5             | 0.51 |
| <b>Chew tobacco</b>                                                                                                                                                                                                                             | 30.3             | 23.4             | 0.35 |
| <b>Hypertension</b>                                                                                                                                                                                                                             | 31.1             | 37.0             | 0.27 |
| <b>Diabetes</b>                                                                                                                                                                                                                                 | 12.6             | 8.5              | 0.22 |
| <b>Hypercholesterolemia</b>                                                                                                                                                                                                                     | 10.1             | 8.9              | 0.73 |
| <p>a: one participant that was excluded from the final analyses had not responded to the questionnaire</p> <p>b: one participant had completed the screening and thus was included in the analyses but did not respond to the questionnaire</p> |                  |                  |      |
